# Supplementary material for: Monitoring Pharmaceuticals and Personal Care Products in Drinking Water Samples by the LC-MS/MS Method to Estimate Their Potential Health Risk
Source: MDPI journal article supplement (doi:10.3390/molecules28155899), 2023-08-05
Supplement: s1 [file s1]

**Table S1.** List of analytical standards of drugs included in the validation and their characteristics - CAS number, summary formula, relative molecular weight and structure.

|    | Analyt                  | CAS         | Summary formula<br>(Relative<br>molecular<br>weight)                      | Structure                                                                             | Supplier           |
|----|-------------------------|-------------|---------------------------------------------------------------------------|---------------------------------------------------------------------------------------|--------------------|
| 1  | Anastrozole             | 120511-73-1 | C <sub>17</sub> H <sub>19</sub> N <sub>5</sub><br>(293.4)                 | 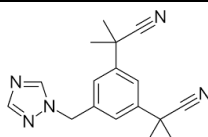   | Merck              |
| 2  | Atenolol                | 29122-68-7  | C <sub>14</sub> H <sub>22</sub> N <sub>2</sub> O <sub>3</sub><br>(266.3)  |    | Merck              |
| 3  | Azathioprine            | 446-86-6    | C <sub>9</sub> H <sub>7</sub> N <sub>7</sub> O <sub>2</sub> S<br>(277.3)  |   | Sigma -<br>Aldrich |
| 4  | Bezafibrate             | 41859-67-0  | C <sub>19</sub> H <sub>20</sub> ClNO <sub>4</sub><br>(361.8)              |  | Neochema           |
| 5  | Buprenorphine           | 52485-79-7  | C <sub>29</sub> H <sub>41</sub> NO <sub>4</sub><br>(467.6)                |  | Chromservis        |
| 6  | Butorphanol tartrate    | 200-659-6   | C <sub>21</sub> H <sub>29</sub> NO <sub>2</sub><br>(327.5)                |  | Merck              |
| 7  | Caffeine                | 58-08-2     | C <sub>8</sub> H <sub>10</sub> N <sub>4</sub> O <sub>2</sub><br>(194.2)   |  | Neochema           |
| 8  | Capecitabine            | 154361-50-9 | C <sub>15</sub> H <sub>22</sub> FN <sub>3</sub> O <sub>6</sub><br>(359.4) |  | Merck              |
| 9  | Carbamazepine           | 298-46-4    | C <sub>15</sub> H <sub>12</sub> N <sub>2</sub> O<br>(236.3)               |  | Neochema           |
| 10 | Citalopram hydrobromide | 59729-33-8  | C <sub>20</sub> H <sub>21</sub> FN <sub>2</sub> O · HBr<br>(323.1)        |  | Neochema           |

|    | Analyt                           | CAS        | Summary formula<br>(Relative<br>molecular<br>weight) | Structure                                                                             | Supplier    |
|----|----------------------------------|------------|------------------------------------------------------|---------------------------------------------------------------------------------------|-------------|
| 11 | Clofibric acid                   | 882-09-7   | $C_{10}H_{11}ClO_3$<br>(214.7)                       | 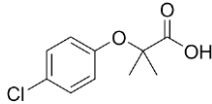   | Neochema    |
| 12 | Cyclobenzaprine<br>hydrochloride | 6202-23-9  | $C_{20}H_{21}N \cdot HCl$<br>(311.9)                 |    | Chromservis |
| 13 | Cyclophosphamide<br>monohydrate  | 50-18-0    | $C_7H_{15}Cl_2N_2O_2P \cdot H_2O$<br>(279.1)         |    | Neochema    |
| 14 | Diazepam                         | 439-14-5   | $C_{16}H_{13}ClN_2O$<br>(284.7)                      |   | Chromservis |
| 15 | Diclofenac sodium                | 15307-79-6 | $C_{14}H_{11}Cl_2NO_2$<br>(296.2)                    |  | Neochema    |
| 16 | Enalapril maleate                | 76095-16-4 | $C_{20}H_{28}N_2O_5 \cdot C_4H_4O_4$<br>(492.5)      |  | Neochema    |
| 17 | Fluoxetine hydrochloride         | 59333-67-4 | $C_{17}H_{18}F_3NO$<br>(345.8)                       |  | Neochema    |
| 18 | Flutamide                        | 13311-84-7 | $C_{11}H_{11}F_3N_2O_3$<br>(276.2)                   |  | Merck       |
| 19 | Furosemide                       | 54-31-9    | $C_{12}H_{11}ClN_2O_5S$<br>(308.7)                   |  | Neochema    |
| 20 | Gabapentin                       | 60142-96-3 | $C_9H_{17}NO_2$<br>(171.2)                           |  | Neochema    |

|    | Analyt                   | CAS        | Summary formula<br>(Relative<br>molecular<br>weight)                                      | Structure                                                                             | Supplier |
|----|--------------------------|------------|-------------------------------------------------------------------------------------------|---------------------------------------------------------------------------------------|----------|
| 21 | Gemfibrozil              | 25812-30-0 | C <sub>15</sub> H <sub>22</sub> O <sub>3</sub><br>(250.3)                                 | 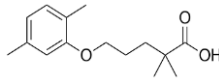   | Neochema |
| 22 | Hydrochlorothiazide      | 58-93-5    | C <sub>7</sub> H <sub>8</sub> ClN <sub>3</sub> O <sub>4</sub> S <sub>2</sub><br>(297.7)   |    | Neochema |
| 23 | Chloramphenicol          | 56-75-7    | C <sub>11</sub> H <sub>12</sub> Cl <sub>2</sub> N <sub>2</sub> O <sub>5</sub><br>(297.7)  |    | Neochema |
| 24 | Ifosfamide               | 3778-73-2  | C <sub>7</sub> H <sub>15</sub> Cl <sub>2</sub> N <sub>2</sub> O <sub>2</sub> P<br>(261.1) |   | Neochema |
| 25 | Indomethacin             | 53-86-1    | C <sub>19</sub> H <sub>16</sub> ClNO <sub>4</sub><br>(357.8)                              |  | Neochema |
| 26 | Iomeprol                 | 78649-41-9 | C <sub>17</sub> H <sub>22</sub> I <sub>3</sub> N <sub>3</sub> O <sub>8</sub><br>(777.1)   |  | Neochema |
| 27 | Iopamidol                | 60166-93-0 | C <sub>17</sub> H <sub>22</sub> I <sub>3</sub> N <sub>3</sub> O <sub>8</sub><br>(777.1)   |  | Neochema |
| 28 | Iopromide                | 73334-07-3 | C <sub>18</sub> H <sub>24</sub> I <sub>3</sub> N <sub>3</sub> O <sub>8</sub><br>(791.1)   |  | Neochema |
| 29 | Ketoprofen               | 22071-15-4 | C <sub>16</sub> H <sub>14</sub> O <sub>3</sub><br>(254.3)                                 |  | Neochema |
| 30 | Lincomycin hydrochloride | 154-21-2   | C <sub>18</sub> H <sub>34</sub> N <sub>2</sub> O <sub>6</sub> S<br>(406.5)                |  | Neochema |

|    | Analyt                         | CAS         | Summary formula<br>(Relative<br>molecular<br>weight)   | Structure                                                                             | Supplier    |
|----|--------------------------------|-------------|--------------------------------------------------------|---------------------------------------------------------------------------------------|-------------|
| 31 | Loperamide hydrochloride       | 34552-83-5  | $C_{29}H_{33}ClN_2O_2 \cdot HCl$<br>(477.0)            | 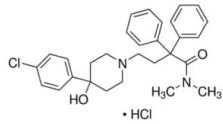   | Chromservis |
| 32 | Metoprolol tartrate            | 37350-58-6  | $C_{15}H_{25}NO_3$<br>$\cdot 1/2 C_4H_6O_6$<br>(267.4) |    | Neochemia   |
| 33 | Metronidazole                  | 443-48-1    | $C_6H_9N_3O_3$<br>(171.1)                              |    | Neochemia   |
| 34 | Mycophenolate Mofetil          | 128794-94-5 | $C_{23}H_{31}NO_7$<br>(433.5)                          |   | Merck       |
| 35 | Naproxen                       | 22204-53-1  | $C_{14}H_{14}O_3$<br>(230.3)                           |  | Neochemia   |
| 36 | Oxazepam                       | 604-75-1    | $C_{15}H_{11}ClN_2O_2$<br>(286.7)                      |  | Chromservis |
| 37 | Paclitaxel                     | 33069-62-4  | $C_{47}H_{51}NO_{14}$<br>(853.9)                       |  | Chromservis |
| 38 | Paracetamol<br>(Acetaminophen) | 103-90-2    | $C_8H_9NO_2$<br>(151.2)                                |  | Neochemia   |
| 39 | Piroxicam                      | 36322-90-4  | $C_{15}H_{13}N_3O_4S$<br>(331.4)                       |  | Neochemia   |
| 40 | Propranolol hydrochloride      | 525-66-6    | $C_{16}H_{22}ClNO_2 \cdot HCl$<br>(259.3)              |  | Neochemia   |

|        |                          |             | Summary formula<br>(Relative<br>molecular<br>weight) | Structure                                                                             | Supplier |
|--------|--------------------------|-------------|------------------------------------------------------|---------------------------------------------------------------------------------------|----------|
| Analyt | CAS                      |             |                                                      |                                                                                       |          |
| 41     | Salbutamol               | 18559-94-9  | $C_{13}H_{21}NO_3$<br>(239.3)                        | 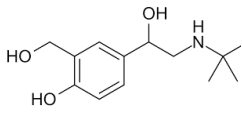   | Neochema |
| 42     | Sertraline hydrochloride | 79617-96-2  | $C_{17}H_{17}Cl_2N \cdot HCl$<br>(306.2)             |    | Merck    |
| 43     | Sotalol hydrochloride    | 959-24-0    | $C_{12}H_{20}N_2O_3S \cdot HCl$<br>(308.8)           |    | Neochema |
| 44     | Sulfamethazine           | 57-68-1     | $C_{12}H_{14}N_4O_2S$<br>(278.3)                     |   | Neochema |
| 45     | Sulfamethoxazole         | 723-46-6    | $C_{10}H_{11}N_3O_3S$<br>(253.3)                     |  | Neochema |
| 46     | Terbutaline              | 23031-25-6  | $C_{12}H_{19}NO_3$<br>(225.3)                        |  | Neochema |
| 47     | Thebaine                 | 115-37-7    | $C_{19}H_{21}NO_3$<br>(311.4)                        |  | TEVA     |
| 48     | Tramadol hydrochloride   | 36282-47-0  | $C_{16}H_{25}NO_2 \cdot HCl$<br>(263.4)              |  | Neochema |
| 49     | Trimethoprim             | 738-70-5    | $C_{14}H_{18}N_4O_3$<br>(290.3)                      |  | Neochema |
| 50     | Valsartan                | 137862-53-4 | $C_{24}H_{29}N_5O_3$<br>(435.5)                      |  | Neochema |

|    | Analyt                | CAS        | Summary formula<br>(Relative<br>molecular<br>weight)        | Structure                                                                           | Supplier    |
|----|-----------------------|------------|-------------------------------------------------------------|-------------------------------------------------------------------------------------|-------------|
| 51 | Warfarin              | 81-81-2    | C <sub>19</sub> H <sub>16</sub> O <sub>4</sub><br>(308.3)   | 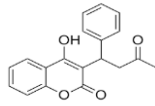 | Neochema    |
| 52 | Zolpidem hemitartrate | 99294-93-6 | C <sub>19</sub> H <sub>21</sub> N <sub>3</sub> O<br>(307.4) |  | Chromservis |

**Table S2.** List of ISTDs included in the validation and their characteristics - ISTD CAS number, summary formula, relative molecular weight and structure.

|   | Name                     | CAS          | Summary formula<br>(Relative<br>molecular<br>weight)                                                  | Structure                                                                             | Supplier    |
|---|--------------------------|--------------|-------------------------------------------------------------------------------------------------------|---------------------------------------------------------------------------------------|-------------|
| 1 | Atrazine D5              | 163165-75-1  | C <sub>8</sub> H <sub>14</sub> ClN <sub>5</sub><br>(220.7)                                            | 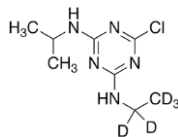 | Chromservis |
| 2 | Atrazine-desisopropyl D5 | 1189961-78-1 | C <sub>5</sub> H <sub>8</sub> ClN <sub>5</sub><br>(178.63)                                            |  | Chromservis |
| 3 | Caffeine-13C             | 78072-66-9   | <sup>13</sup> C <sub>3</sub> C <sub>5</sub> H <sub>10</sub> N <sub>4</sub> O <sub>2</sub><br>(197.17) |  | Neochema    |
| 4 | Carbamazepine D10        | 132183-78-9  | C <sub>15</sub> D <sub>10</sub> H <sub>2</sub> N <sub>2</sub> O<br>(246.33)                           |  | Neochema    |

|    | Name                       | CAS          | Summary formula<br>(Relative molecular weight) | Structure | Supplier    |
|----|----------------------------|--------------|------------------------------------------------|-----------|-------------|
| 5  | Carbendazim D4             | 291765-95-2  | $C_9H_9N_3O_2$<br>(195.21)                     |           | HPST        |
| 6  | Citalopram D6 hydrobromide | 1190003-26-9 | $C_{20}H_{15}D_6FN_2O$<br>·HBr<br>(330.43)     |           | Chromservis |
| 7  | Diclofenac D4              | 153466-65-0  | $C_{14}H_7D_4Cl_2NO_2$<br>(300.17)             |           | Neochema    |
| 8  | Metolachlor D6             | 1219803-97-0 | $C_{15}H_{16}D_6ClNO_2$<br>(289.83)            |           | Chromservis |
| 9  | Naproxen 13C D3            | 1216704-11-8 | $C_{13}^{13}CH_{11}D_3O_3$<br>(234.27)         |           | Chromservis |
| 10 | Norethindrone D6           | -            | $C_{20}H_{20}D_6O_2$<br>(304.46)               |           | Chromservis |
| 11 | Phosalone D10              | -            | $C_{12}H_5ClD_{10}NO_4PS$<br>2<br>(377.87)     |           | Chromservis |
| 12 | Sulfamethoxazole D4        | 1020719-86-1 | $C_{10}H_7D_4N_3O_3S$<br>(257.30)              |           | Neochema    |

|    | Name            | CAS | Summary formula<br>(Relative molecular weight)                               | Structure                                                                           | Supplier    |
|----|-----------------|-----|------------------------------------------------------------------------------|-------------------------------------------------------------------------------------|-------------|
| 13 | Tebuconazole D6 | -   | C <sub>16</sub> H <sub>16</sub> ClN <sub>3</sub> OD <sub>6</sub><br>(313.86) | 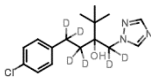 | Chromservis |

**Table S3.** Parameters of the MS/MS method (MRM transitions of analytes. collision energy and retention time of analytes) - transitions marked in bold are used as quantification (\* designation of precursor ions containing 2 isotopes of chlorine atoms).

| Analyte          | Ionization | Precursor ions<br>( <i>m/z</i> ) | Product ions<br>( <i>m/z</i> ) | Cone voltage<br>(V) | Collision energy (V) | Retention time<br>(tr) |
|------------------|------------|----------------------------------|--------------------------------|---------------------|----------------------|------------------------|
| Anastrozole      | ESI+       | 294.1                            | <b>225.0</b> /114.8            | 30                  | 20/52                | 4.24                   |
| Atenolol         | ESI+       | 267.0                            | <b>145.0</b> /190.0            | 30                  | 23/16                | 2.55                   |
| Azathioprine     | ESI+       | 278.0                            | <b>141.8</b> /232.0            | 30                  | 11/13                | 2.92                   |
| Bezafibrate      | ESI+       | 262.0                            | <b>139.0</b> /121.0            | 30                  | 25/29                | 4.70                   |
| Buprenorphine    | ESI+       | 468.3                            | <b>396.1</b> /414.2            | 30                  | 39/32                | 3.83                   |
| Butorphanol      | ESI+       | 328.0                            | <b>124.0</b> /282.0            | 30                  | 26/29                | 3.47                   |
| Caffeine         | ESI+       | 195.0                            | <b>138.0</b> /110.0            | 30                  | 17/23                | 2.89                   |
| Capecitabine     | ESI+       | 360.0                            | <b>173.8</b> /244.0            | 30                  | 19/10                | 3.94                   |
| Carbamazepine    | ESI+       | 237.0                            | <b>194.0</b> /179.0            | 35                  | 20/35                | 4.16                   |
| Citalopram       | ESI+       | 325.2                            | <b>109.0</b> /262.2            | 30                  | 24/19                | 3.72                   |
| Clofibric acid   | ESI-       | 213.0                            | <b>127.0</b> /85.0             | 30                  | 15/11                | 4.59                   |
| Cyclobenzaprine  | ESI+       | 276.0                            | <b>216.0</b> /231.0            | 30                  | 24/16                | 3.93                   |
| Cyclophosphamide | ESI+       | 261.0                            | <b>140.0</b> /106.0            | 30                  | 22/18                | 3.70                   |
| Diazepam         | ESI+       | 285.0                            | <b>154.0</b> /193.0            | 30                  | 26/30                | 4.94                   |
| Diclofenac       | ESI+       | 294.0/296.0*                     | <b>250.0</b> /252.0            | 30                  | 11/11                | 5.21                   |



| Analyte                        | Ionization | Precursor ions<br>( <i>m/z</i> ) | Product ions<br>( <i>m/z</i> ) | Cone<br>voltage<br>(V) | Collision<br>energy (V) | Retention<br>time<br>(tr) |
|--------------------------------|------------|----------------------------------|--------------------------------|------------------------|-------------------------|---------------------------|
| Enalapril                      | ESI-       | 377.1                            | 234.0/91.0                     | 30                     | 20/55                   | 3.66                      |
| Fluoxetine                     | ESI+       | 310.1                            | 148.0/44.0                     | 30                     | 8/7                     | 4.05                      |
| Flutamide                      | ESI-       | 275.0                            | 202.0/205.0                    | 30                     | 23/22                   | 5.09                      |
| Furosemide                     | ESI-       | 329.0                            | 205.0/285.0                    | 30                     | 22/14                   | 4.06                      |
| Gabapentin                     | ESI+       | 172.2                            | 154.3/137.3                    | 25                     | 15/18                   | 2.72                      |
| Gemfibrozil                    | ESI-       | 249.0                            | 121.0/127.0                    | 30                     | 15/10                   | 5.47                      |
| Hydrochlorothiazide            | ESI-       | 296.0                            | 269.0/205.0                    | 30                     | 19/22                   | 2.88                      |
| Chloramphenicol                | ESI-       | 321.0                            | 152.1/257.1                    | 30                     | 18/12                   | 3.73                      |
| Ifosfamide                     | ESI+       | 261.0                            | 92.0/154.0                     | 30                     | 25/21                   | 3.64                      |
| Indomethacin                   | ESI+       | 358.0                            | 139.0/174.0                    | 30                     | 22/11                   | 5.20                      |
| Iomeprol                       | ESI+       | 777.8                            | 405.0/531.8                    | 30                     | 38/30                   | 2.46                      |
| Iopamidol                      | ESI+       | 777.8                            | 387.0/313.8                    | 30                     | 39/52                   | 1.93                      |
| Iopromide                      | ESI+       | 791.8                            | 300.0/572.8                    | 30                     | 56/23                   | 2.65                      |
| Ketoprofen                     | ESI+       | 255.1                            | 209.0/105.0                    | 30                     | 15/23                   | 4.67                      |
| Lincomycin                     | ESI+       | 407.0                            | 126.0/359.0                    | 35                     | 20/18                   | 2.83                      |
| Loperamide                     | ESI+       | 477.2                            | 210.1/266.1                    | 30                     | 45/12                   | 4.29                      |
| Metoprolol                     | ESI+       | 268.2                            | 116.0/72.0                     | 30                     | 18/22                   | 3.25                      |
| Metronidazole                  | ESI+       | 172.0                            | 128.0/82.0                     | 30                     | 15/21                   | 2.71                      |
| Mycophenolate Mofetil          | ESI+       | 434.0                            | 114.0/195.0                    | 30                     | 24/33                   | 3.82                      |
| Naproxen                       | ESI+       | 231.0                            | 185.0/170.0                    | 30                     | 14/29                   | 4.63                      |
| Oxazepam                       | ESI+       | 287.0                            | 241.0/269.0                    | 30                     | 23/15                   | 4.30                      |
| Paclitaxel                     | ESI+       | 876.4                            | 308.1/591.3                    | 30                     | 27/23                   | 5.08                      |
| Paracetamol<br>(Acetaminophen) | ESI+       | 152.0                            | 110.0/65.0                     | 30                     | 15/30                   | 2.68                      |

| Analyte                  | Ionization | Precursor ions<br>( <i>m/z</i> ) | Product ions<br>( <i>m/z</i> ) | Cone<br>voltage<br>(V) | Collision<br>energy (V) | Retention<br>time<br>(tr) |
|--------------------------|------------|----------------------------------|--------------------------------|------------------------|-------------------------|---------------------------|
| Piroxicam                | ESI+       | 332.0                            | 95.0/121.0                     | 30                     | 18/25                   | 4.33                      |
| Propranolol              | ESI+       | 260.0                            | 116.0/183.0                    | 30                     | 16/16                   | 3.65                      |
| Salbutamol               | ESI+       | 240.0                            | 148.0/166.0                    | 30                     | 20/12                   | 2.52                      |
| Sertraline               | ESI+       | 306.0                            | 159.0/275.0                    | 30                     | 23/11                   | 4.04                      |
| Sotalol                  | ESI+       | 273.0                            | 133.0/213.0                    | 30                     | 27/17                   | 2.52                      |
| Sulfamethazine           | ESI+       | 279.0                            | 124.0/186.0                    | 30                     | 20/18                   | 3.26                      |
| Sulfamethoxazole         | ESI+       | 254.0                            | 156.0/92.0                     | 30                     | 16/26                   | 3.58                      |
| Terbutaline              | ESI+       | 226.1                            | 152.0/107.0                    | 30                     | 16/26                   | 2.47                      |
| Thebaine                 | ESI+       | 312.0                            | 58.0/266.0                     | 30                     | 30/40                   | 3.29                      |
| Tramadol                 | ESI+       | 264.0                            | 58.0/246.0                     | 30                     | 15/10                   | 3.26                      |
| Trimethoprim             | ESI+       | 291.0                            | 230.0/123.0                    | 39                     | 24/27                   | 2.90                      |
| Valsartan                | ESI+       | 436.0                            | 207.0/235.0                    | 30                     | 28/22                   | 4.72                      |
| Warfarin                 | ESI+       | 309.0                            | 163.0/251.0                    | 30                     | 14/22                   | 4.91                      |
| Zolpidem                 | ESI+       | 308.0                            | 235.0/263.0                    | 30                     | 33/27                   | 3.44                      |
| Atrazine D5              | ESI+       | 221.0/223.0*                     | 179.0/181.0                    | 35                     | 18/18                   | 4.53                      |
| Atrazine-desisopropyl D5 | ESI+       | 179.0                            | 101.0/137.0                    | 35                     | 18/16                   | 3.10                      |
| Caffeine-13C             | ESI+       | 198.0                            | 140.0/112.0                    | 30                     | 19/22                   | 2.89                      |
| Carbamazepine D10        | ESI+       | 247.0                            | 204.0/201.0                    | 30                     | 21/22                   | 4.14                      |
| Carbendazim D4           | ESI+       | 196.0                            | 164.0/136.0                    | 35                     | 20/28                   | 2.90                      |
| Citalopram D6            | ESI+       | 331.3                            | 109.1/262.2                    | 30                     | 26/19                   | 3.78                      |
| Diclofenac D4            | ESI-       | 298.0/300.0*                     | 254.0/256.0                    | 30                     | 12/12                   | 5.20                      |
| Phosalon D10             | ESI+       | 378.0                            | 182.0/111.0                    | 35                     | 16/38                   | 5.77                      |
| Metolachlor D6           | ESI+       | 290.0                            | 258.0/182.0                    | 35                     | 16/25                   | 5.39                      |

| Analyte             | Ionization | Precursor ions<br>( <i>m/z</i> ) | Product ions<br>( <i>m/z</i> ) | Cone<br>voltage<br>(V) | Collision<br>energy (V) | Retention<br>time<br>(tr) |
|---------------------|------------|----------------------------------|--------------------------------|------------------------|-------------------------|---------------------------|
| Naproxen 13C D3     | ESI+       | 235.0                            | 189.0/170.0                    | 30                     | 15/25                   | 4.62                      |
| Noreethindrone D6   | ESI+       | 305.3                            | 113.0/237.2                    | 30                     | 30/21                   | 4.71                      |
| Sulfamethoxazole D4 | ESI+       | 258.0                            | 160.0/96.0                     | 30                     | 16/26                   | 3.57                      |
| Tebuconazole D6     | ESI+       | 314.0                            | 71.8/124.8                     | 30                     | 21/38                   | 5.24                      |

**Table S4.** List of ISTDs and assigned analytes in MQ and drinking matrices.

| ISTD – MQ and drinking water | Analyte                                                                                                                                                         |
|------------------------------|-----------------------------------------------------------------------------------------------------------------------------------------------------------------|
| Atrazine D5                  | Anastrozole<br>Bezafibrate<br>Capecitabine<br>Cyclophosphamide<br>Diazepam<br>Enalapril<br>Flutamide<br>Indomethacin<br>Oxazepam<br>Piroxicam<br>Sulfamethazine |
| Atrazine-desisopropyl D5     | Lincomycin<br>Paracetamol (Acetaminophen)                                                                                                                       |
| Caffeine-13C                 | Caffeine<br>Iopamidol<br>Iopromide                                                                                                                              |
| Carbamazepine D10            | Carbamazepine<br>Fluoxetine<br>Valsartan                                                                                                                        |
| Carbendazim D4               | Azathioprine<br>Cyklobenzaprine<br>Gabapentin<br>Chloramphenikol                                                                                                |

| ISTD – MQ and drinking water | Analyte               |
|------------------------------|-----------------------|
|                              | Ifosfamide            |
|                              | Metronidazole         |
|                              | Trimethoprim          |
|                              | Zolpidem              |
| Citalopram D6                | Atenolol              |
|                              | Buprenorphine         |
|                              | Butorphanol           |
|                              | Citalopram            |
|                              | Iomeprol              |
|                              | Loperamide            |
|                              | Metoprolol            |
|                              | Salbutamol            |
|                              | Sotalol               |
|                              | Terbutaline           |
|                              | Thebaine              |
|                              | Tramadol              |
| Diclofenac D4                | Diclofenac            |
| Metolachlor D6               | Gemfibrozil           |
| Naproxen 13C D3              | Clofibric acid        |
| Noreethindrone D6            | Naproxen              |
|                              | Paclitaxel            |
|                              | Propranolol           |
|                              | Sertraline            |
| Phosalone D10                | Furosemide            |
|                              | Ketoprofen            |
| Sulfamethoxazole D4          | Mycophenolate mofetil |
|                              | Sulfamethoxazole      |
| Tebuconazole D6              | Hydrochlorothiazide   |
|                              | Warfarin              |

**Table S5.** Overview of linear range, coefficient of determination (R<sup>2</sup>) values and working range for individual analytes in drinking water.

| Analyte               | Linear range<br>[ng L <sup>-1</sup> ] | Coefficient of<br>determination<br>(R <sup>2</sup> ) | Working range for<br>drinking waters<br>[ng L <sup>-1</sup> ] |
|-----------------------|---------------------------------------|------------------------------------------------------|---------------------------------------------------------------|
| Anastrozole           | 2.5 – 500                             | 0.9998                                               | 5.0 – 500                                                     |
| Atenolol              | 2.5 – 500                             | 0.9997                                               | 10.0 – 500                                                    |
| Azathioprine          | 2.5 – 500                             | 0.9997                                               | 10.0 – 500                                                    |
| Bezafibrate           | 2.5 – 1000                            | 0.9999                                               | 10.0 – 1000                                                   |
| Buprenorphine         | 2.5 – 1000                            | 0.9994                                               | 5.0 – 1000                                                    |
| Butorphanol           | 2.5 – 1000                            | 0.9997                                               | 25.0 – 500                                                    |
| Caffeine              | 50.0 – 1000                           | 0.9988                                               | 250.0 – 1000                                                  |
| Capecitabine          | 5.0 – 1000                            | 0.9992                                               | 250.0 – 1000                                                  |
| Carbamazepine         | 2.5 – 1000                            | 1.0000                                               | 5.0 – 1000                                                    |
| Citalopram            | 2.5 – 1000                            | 0.9993                                               | 25.0 – 1000                                                   |
| Clofibric acid        | 50.0 – 1000                           | 0.9996                                               | 250.0 – 1000                                                  |
| Cyclobenzaprine       | 50.0 – 1000                           | 0.9997                                               | 100.0 – 1000                                                  |
| Cyclophosphamide      | 2.5 – 1000                            | 0.9999                                               | 10.0 – 1000                                                   |
| Diazepam              | 2.5 – 1000                            | 0.9999                                               | 2.5 – 1000                                                    |
| Diclofenac            | 5.0 – 1000                            | 0.9996                                               | 50.0 – 1000                                                   |
| Enalapril             | 2.5 – 1000                            | 0.9999                                               | 10.0 – 1000                                                   |
| Fluoxetine            | 50.0 – 1000                           | 0.9993                                               | 250.0 – 1000                                                  |
| Flutamide             | 2.5 – 1000                            | 0.9999                                               | 10.0 – 1000                                                   |
| Furosemide            | 5.0 – 1000                            | 0.9995                                               | 25.0 – 1000                                                   |
| Gabapentin            | 50.0 – 1000                           | 0.9997                                               | 50.0 – 1000                                                   |
| Gemfibrozil           | 5.0 – 1000                            | 0.9997                                               | 25.0 – 1000                                                   |
| Hydrochlorothiazide   | 2.5 – 500                             | 0.9997                                               | 25.0 – 500                                                    |
| Chloramfenikol        | 2.5 – 1000                            | 0.9992                                               | 25.0 – 1000                                                   |
| Ifosfamide            | 2.5 – 1000                            | 0.9999                                               | 10.0 – 1000                                                   |
| Indomethacin          | 2.5 – 1000                            | 0.9999                                               | 10.0 – 1000                                                   |
| Iomeprol              | 50.0 – 1000                           | 0.9994                                               | 500.0 – 1000                                                  |
| Iopamidol             | 2.5 – 1000                            | 0.9991                                               | 25.0 – 1000                                                   |
| Iopromide             | 2.5 – 500                             | 0.9991                                               | 25.0 – 500                                                    |
| Ketoprofen            | 2.5 – 1000                            | 0.9998                                               | 10.0 – 1000                                                   |
| Lincomycin            | 2.5 – 1000                            | 0.9999                                               | 10.0 – 1000                                                   |
| Loperamide            | 50.0 – 1000                           | 0.9997                                               | 250.0 – 1000                                                  |
| Metoprolol            | 2.5 – 1000                            | 0.9996                                               | 10.0 – 1000                                                   |
| Metronidazole         | 2.5 – 500                             | 0.9999                                               | 2.5 – 500                                                     |
| Mycophenolate Mofetil | 2.5 – 1000                            | 0.9998                                               | 25.0 – 1000                                                   |
| Naproxen              | 50.0 – 1000                           | 0.9993                                               | 75.0 – 1000/                                                  |
| Oxazepam              | 2.5 – 1000                            | 0.9999                                               | 5.0 – 1000                                                    |
| Paclitaxel            | 5.0 – 1000                            | 0.9995                                               | 250.0 – 1000                                                  |
| Paracetamol           | 2.5 – 500                             | 0.9998                                               | 25.0 – 500                                                    |
| Piroxicam             | 2.5 – 1000                            | 1.0000                                               | 5.0 – 1000                                                    |
| Propranolol           | 2.5 – 1000                            | 0.9998                                               | 10.0 – 1000                                                   |

| Analyte          | Linear range<br>[ng L <sup>-1</sup> ] | Coefficient of<br>determination<br>(R <sup>2</sup> ) | Working range for<br>drinking waters<br>[ng L <sup>-1</sup> ] |
|------------------|---------------------------------------|------------------------------------------------------|---------------------------------------------------------------|
| Salbutamol       | 2.5 – 500                             | 0.9997                                               | 25.0 – 500                                                    |
| Sertraline       | 50.0 – 1000                           | 0.9990                                               | 250.0 – 1000                                                  |
| Sotalol          | 2.5 – 500                             | 0.9996                                               | 10.0 – 500                                                    |
| Sulfamethazine   | 2.5 – 1000                            | 0.9999                                               | 5.0 – 1000                                                    |
| Sulfamethoxazole | 2.5 – 1000                            | 0.9999                                               | 10.0 – 1000                                                   |
| Terbutaline      | 2.5 – 500                             | 0.9997                                               | 25.0 – 500                                                    |
| Thebaine         | 2.5 – 1000                            | 0.9998                                               | 25.0 – 1000                                                   |
| Tramadol         | 2.5 – 1000                            | 0.9998                                               | 25.0 – 1000                                                   |
| Trimethoprim     | 2.5 – 1000                            | 0.9999                                               | 25.0 – 1000                                                   |
| Valsartan        | 2.5 – 1000                            | 0.9999                                               | 25.0 – 1000                                                   |
| Warfarin         | 2.5 – 1000                            | 0.9999                                               | 10.0 – 1000                                                   |
| Zolpidem         | 2.5 – 500                             | 0.9998                                               | 10.0 – 500                                                    |

**Table S6.** Summary of repeatability results expressed as RSD (%). average of measured concentrations of a given analyte at one concentration level and standard deviation of individual analytes in MQ water.

| Analyte             | MQ water                         |                             |         |                                  |                             |         |
|---------------------|----------------------------------|-----------------------------|---------|----------------------------------|-----------------------------|---------|
|                     | L1 (0.01 ng mL <sup>-1</sup> )   |                             |         | L2 (0.1 ng mL <sup>-1</sup> )    |                             |         |
|                     | Average<br>[ng L <sup>-1</sup> ] | SD<br>[ng L <sup>-1</sup> ] | RSD [%] | Average<br>[ng L <sup>-1</sup> ] | SD<br>[ng L <sup>-1</sup> ] | RSD [%] |
| Anastrozole         | 9.57                             | 0.26                        | 2.69    | 94.09                            | 2.56                        | 2.72    |
| Atenolol            | 11.47                            | 0.88                        | 7.67    | 113.00                           | 4.05                        | 3.58    |
| Azathioprine        | 9.87                             | 0.48                        | 4.86    | 94.84                            | 2.02                        | 2.13    |
| Bezafibrate         | 8.88                             | 0.86                        | 9.67    | 82.09                            | 6.82                        | 8.31    |
| Buprenorphine       | 12.04                            | 0.40                        | 3.34    | 113.34                           | 6.63                        | 5.85    |
| Butorphanol         | 11.92                            | 1.12                        | 9.42    | 115.00                           | 7.19                        | 6.25    |
| Caffeine            | n.d.*                            | -                           | -       | 95.94                            | 15.60                       | 17.15   |
| Capecitabine        | n.d.*                            | -                           | -       | 88.04                            | 17.02                       | 19.34   |
| Carbamazepine       | 9.54                             | 0.36                        | 3.80    | 95.47                            | 1.75                        | 1.83    |
| Citalopram          | 13.39                            | 1.37                        | 10.23   | 112.12                           | 5.22                        | 4.66    |
| Clofibric acid      | n.d.*                            | -                           | -       | 66.05                            | 12.59                       | 19.07   |
| Cyclobenzaprine     | n.d.*                            | -                           | -       | 67.31                            | 7.70                        | 11.44   |
| Cyclophosphamide    | 9.26                             | 0.56                        | 6.05    | 95.57                            | 2.51                        | 2.63    |
| Diazepam            | 9.79                             | 0.19                        | 1.96    | 93.73                            | 1.90                        | 2.03    |
| Diclofenac          | n.d.*                            | -                           | -       | 77.64                            | 10.55                       | 13.59   |
| Enalapril           | 9.89                             | 0.46                        | 4.62    | 98.87                            | 1.53                        | 1.55    |
| Fluoxetine          | n.d.*                            | -                           | -       | 93.57                            | 17.08                       | 18.26   |
| Flutamide           | 8.69                             | 0.55                        | 6.31    | 80.21                            | 9.53                        | 11.88   |
| Furosemide          | 8.14                             | 1.47                        | 18.00   | 68.79                            | 11.83                       | 17.20   |
| Gabapentin          | n.d.*                            | -                           | -       | 88.59                            | 2.97                        | 3.36    |
| Gemfibrozil         | 10.59                            | 1.05                        | 9.88    | 90.92                            | 5.25                        | 5.77    |
| Hydrochlorothiazide | n.d.*                            | -                           | -       | 97.86                            | 6.27                        | 6.41    |

| Analyte               | MQ water                         |                             |         |                                  |                             |         |
|-----------------------|----------------------------------|-----------------------------|---------|----------------------------------|-----------------------------|---------|
|                       | L1 (0.01 ng mL <sup>-1</sup> )   |                             |         | L2 (0.1 ng mL <sup>-1</sup> )    |                             |         |
|                       | Average<br>[ng L <sup>-1</sup> ] | SD<br>[ng L <sup>-1</sup> ] | RSD [%] | Average<br>[ng L <sup>-1</sup> ] | SD<br>[ng L <sup>-1</sup> ] | RSD [%] |
| Chloramfenikol        | 11.42                            | 1.39                        | 12.14   | 92.78                            | 4.56                        | 4.92    |
| Ifosfamide            | 10.02                            | 0.62                        | 6.16    | 95.11                            | 2.32                        | 2.44    |
| Indomethacin          | 8.44                             | 0.70                        | 8.28    | 73.56                            | 8.58                        | 11.66   |
| Iomeprol              | n.d.*                            | -                           | -       | 87.95                            | 25.87                       | 16.38   |
| Iopamidol             | 9.96                             | 0.92                        | 9.26    | 103.09                           | 0.92                        | 0.89    |
| Iopromide             | 8.13                             | 1.09                        | 13.46   | 105.72                           | 5.11                        | 4.83    |
| Ketoprofen            | 7.79                             | 0.58                        | 7.48    | 76.60                            | 7.72                        | 10.07   |
| Lincomycin            | 10.28                            | 0.64                        | 6.24    | 100.96                           | 1.68                        | 1.67    |
| Loperamide            | n.d.*                            | -                           | -       | 145.68                           | 19.76                       | 13.56   |
| Metoprolol            | 11.55                            | 0.90                        | 7.77    | 103.46                           | 2.72                        | 2.63    |
| Metronidazole         | 9.90                             | 0.19                        | 1.88    | 98.19                            | 0.74                        | 0.75    |
| Mycophenolate Mofetil | 8.10                             | 1.50                        | 18.52   | 86.08                            | 4.92                        | 5.72    |
| Naproxen              | n.d.*                            | -                           | -       | 79.33                            | 6.37                        | 8.03    |
| Oxazepam              | 9.56                             | 0.32                        | 3.30    | 94.31                            | 2.40                        | 2.54    |
| Paclitaxel            | n.d.*                            | -                           | -       | 74.46                            | 12.44                       | 19.29   |
| Paracetamol           | 9.25                             | 1.20                        | 12.96   | 92.01                            | 1.32                        | 1.43    |
| Piroxicam             | 9.93                             | 0.31                        | 3.09    | 97.59                            | 1.10                        | 1.12    |
| Propranolol           | 9.42                             | 0.63                        | 6.65    | 82.26                            | 10.54                       | 16.94   |
| Salbutamol            | 11.96                            | 0.93                        | 7.81    | 113.13                           | 3.82                        | 3.38    |
| Sertraline            | n.d.*                            | -                           | -       | 73.65                            | 14.35                       | 19.49   |
| Sotalol               | 10.97                            | 0.81                        | 7.37    | 107.08                           | 3.48                        | 3.25    |
| Sulfamethazine        | 9.68                             | 0.24                        | 2.49    | 97.16                            | 1.85                        | 1.91    |
| Sulfamethoxazole      | 9.46                             | 0.55                        | 5.78    | 97.58                            | 1.44                        | 1.48    |
| Terbutaline           | 11.93                            | 1.37                        | 11.46   | 117.22                           | 6.27                        | 5.35    |
| Thebaine              | 11.92                            | 1.38                        | 11.61   | 106.99                           | 5.53                        | 5.17    |
| Tramadol              | 11.54                            | 1.09                        | 9.44    | 105.59                           | 3.67                        | 3.48    |
| Trimethoprim          | 8.04                             | 1.19                        | 14.81   | 77.05                            | 8.88                        | 11.52   |
| Valsartan             | 9.09                             | 1.27                        | 14.00   | 82.81                            | 7.58                        | 9.15    |
| Warfarin              | 8.04                             | 0.51                        | 6.36    | 80.45                            | 3.35                        | 4.16    |
| Zolpidem              | 9.29                             | 0.68                        | 7.32    | 88.92                            | 4.02                        | 4.52    |

n.d.\* - detection limit of the analyte is higher than the lower concentration level of the spike L1 = 0.01 µg L<sup>-1</sup>

**Table S7.** Summary of repeatability results expressed as RSD (%). average of measured concentrations of a given analyte at one concentration level and standard deviation of individual analytes in drinking water.

| Analyte     | Drinking water                   |                             |         |                                  |                             |         |
|-------------|----------------------------------|-----------------------------|---------|----------------------------------|-----------------------------|---------|
|             | L1 (0.01 ng mL <sup>-1</sup> )   |                             |         | L2 (0.1 ng mL <sup>-1</sup> )    |                             |         |
|             | Average<br>[ng L <sup>-1</sup> ] | SD<br>[ng L <sup>-1</sup> ] | RSD [%] | Average<br>[ng L <sup>-1</sup> ] | SD<br>[ng L <sup>-1</sup> ] | RSD [%] |
| Anastrozole | 9.47                             | 0.35                        | 3.66    | 94.30                            | 1.65                        | 1.75    |

| Analyte               | Drinking water                   |                             |         |                                  |                             |         |
|-----------------------|----------------------------------|-----------------------------|---------|----------------------------------|-----------------------------|---------|
|                       | L1 (0.01 ng mL <sup>-1</sup> )   |                             |         | L2 (0.1 ng mL <sup>-1</sup> )    |                             |         |
|                       | Average<br>[ng L <sup>-1</sup> ] | SD<br>[ng L <sup>-1</sup> ] | RSD [%] | Average<br>[ng L <sup>-1</sup> ] | SD<br>[ng L <sup>-1</sup> ] | RSD [%] |
| Atenolol              | 10.75                            | 0.48                        | 4.43    | 101.98                           | 1.67                        | 1.64    |
| Azathioprine          | 9.39                             | 0.38                        | 4.09    | 91.88                            | 2.35                        | 2.56    |
| Bezafibrate           | 8.27                             | 0.79                        | 9.57    | 91.29                            | 6.00                        | 6.57    |
| Buprenorphine         | 8.93                             | 1.03                        | 11.53   | 90.03                            | 5.83                        | 6.48    |
| Butorphanol           | 9.47                             | 0.32                        | 3.36    | 94.51                            | 0.99                        | 1.05    |
| Caffeine              | n.d.*                            | -                           | -       | 66.84                            | 5.50                        | 8.24    |
| Capecitabine          | n.d.*                            | -                           | -       | 220.97*                          | 15.88                       | 7.19    |
| Carbamazepine         | 10.01                            | 0.30                        | 3.01    | 95.98                            | 0.96                        | 1.00    |
| Citalopram            | 9.71                             | 0.65                        | 6.65    | 96.71                            | 4.37                        | 4.52    |
| Clofibric acid        | n.d.*                            | -                           | -       | 72.59                            | 9.94                        | 13.69   |
| Cyclobenzaprine       | n.d.*                            | -                           | -       | 113.73                           | 2.64                        | 2.32    |
| Cyclophosphamide      | 9.11                             | 0.51                        | 5.61    | 95.43                            | 1.84                        | 1.92    |
| Diazepam              | 9.48                             | 0.18                        | 1.91    | 96.55                            | 1.13                        | 1.17    |
| Diclofenac            | n.d.*                            | -                           | -       | 82.51                            | 6.30                        | 7.63    |
| Enalapril             | 10.87                            | 0.22                        | 2.03    | 112.76                           | 1.24                        | 1.10    |
| Fluoxetine            | n.d.*                            | -                           | -       | 117.24                           | 4.19                        | 3.58    |
| Flutamide             | 8.09                             | 0.99                        | 12.18   | 85.38                            | 6.96                        | 8.15    |
| Furosemide            | 9.42                             | 0.93                        | 9.90    | 78.48                            | 9.72                        | 12.39   |
| Gabapentin            | n.d.*                            | -                           | -       | 104.98                           | 4.19                        | 3.99    |
| Gemfibrozil           | 8.86                             | 1.54                        | 17.37   | 89.48                            | 5.16                        | 5.77    |
| Hydrochlorothiazide   | n.d.*                            | -                           | -       | 101.70                           | 8.25                        | 8.11    |
| Chloramfenikol        | 10.40                            | 1.59                        | 15.33   | 93.80                            | 4.58                        | 4.88    |
| Ifosfamide            | 9.80                             | 0.51                        | 5.17    | 94.23                            | 1.40                        | 1.48    |
| Indomethacin          | 8.01                             | 1.00                        | 12.43   | 84.73                            | 6.74                        | 7.96    |
| Iomeprol              | n.d.*                            | -                           | -       | 255.86*                          | 45.18                       | 17.66   |
| Iopamidol             | 7.04                             | 0.45                        | 6.37    | 97.52                            | 4.41                        | 4.52    |
| Iopromide             | 7.58                             | 1.23                        | 16.24   | 118.59                           | 6.36                        | 5.37    |
| Ketoprofen            | 8.74                             | 0.34                        | 3.87    | 89.44                            | 4.37                        | 4.89    |
| Lincomycin            | 9.66                             | 0.27                        | 2.82    | 98.26                            | 2.10                        | 2.13    |
| Loperamide            | n.d.*                            | -                           | -       | 134.31*                          | 1.98                        | 1.48    |
| Metoprolol            | 9.56                             | 0.74                        | 7.69    | 97.64                            | 2.62                        | 2.69    |
| Metronidazole         | 9.28                             | 0.16                        | 1.70    | 96.58                            | 0.72                        | 0.74    |
| Mycophenolate Mofetil | 9.19                             | 0.95                        | 10.34   | 88.63                            | 3.86                        | 4.35    |
| Naproxen              | n.d.*                            | -                           | -       | 88.65                            | 9.70                        | 10.94   |
| Oxazepam              | 9.18                             | 0.54                        | 5.93    | 94.50                            | 2.08                        | 2.20    |
| Paclitaxel            | n.d.*                            | -                           | -       | 73.22                            | 7.83                        | 10.69   |
| Paracetamol           | 9.44                             | 0.70                        | 7.45    | 99.41                            | 5.00                        | 5.03    |
| Piroxicam             | 9.28                             | 0.38                        | 4.11    | 96.09                            | 3.29                        | 3.43    |
| Propranolol           | 9.69                             | 0.68                        | 7.01    | 99.35                            | 3.50                        | 3.52    |
| Salbutamol            | 10.04                            | 0.12                        | 1.21    | 104.25                           | 2.20                        | 2.11    |
| Sertraline            | n.d.*                            | -                           | -       | 116.22                           | 1.66                        | 1.43    |
| Sotalol               | 9.64                             | 0.28                        | 2.93    | 99.98                            | 1.47                        | 1.47    |



| Analyte          | Drinking water                   |                             |         |                                  |                             |         |
|------------------|----------------------------------|-----------------------------|---------|----------------------------------|-----------------------------|---------|
|                  | L1 (0.01 ng mL <sup>-1</sup> )   |                             |         | L2 (0.1 ng mL <sup>-1</sup> )    |                             |         |
|                  | Average<br>[ng L <sup>-1</sup> ] | SD<br>[ng L <sup>-1</sup> ] | RSD [%] | Average<br>[ng L <sup>-1</sup> ] | SD<br>[ng L <sup>-1</sup> ] | RSD [%] |
| Sulfamethazine   | 9.75                             | 0.42                        | 4.34    | 94.80                            | 1.19                        | 1.25    |
| Sulfamethoxazole | 9.48                             | 0.42                        | 4.42    | 93.47                            | 1.69                        | 1.81    |
| Terbutaline      | 9.32                             | 0.39                        | 4.18    | 99.91                            | 2.00                        | 2.00    |
| Thebaine         | 9.19                             | 0.73                        | 7.94    | 87.18                            | 4.11                        | 4.72    |
| Tramadol         | 9.40                             | 0.60                        | 6.40    | 92.89                            | 3.24                        | 3.49    |
| Trimethoprim     | 8.96                             | 0.51                        | 5.65    | 92.89                            | 3.78                        | 4.07    |
| Valsartan        | 7.95                             | 1.06                        | 13.36   | 94.91                            | 6.68                        | 7.04    |
| Warfarin         | 9.25                             | 0.68                        | 7.34    | 89.21                            | 2.20                        | 2.46    |
| Zolpidem         | 9.03                             | 0.35                        | 3.93    | 94.05                            | 1.36                        | 1.45    |

*n.d.\** - detection limit of the analyte is higher than the lower concentration level of the spike L1 = 0.01 µg L<sup>-1</sup>

\* The given analytes were determined in raw validation samples at levels that were many times higher than the level of fortification. For these analytes, RSD (%) values were calculated from concentrations determined by repeated spike analysis.

**Table S8.** Method accuracy results expressed as recovery for MQ and drinking water.

| Analyte          | Recovery [%] |       |                |       |
|------------------|--------------|-------|----------------|-------|
|                  | MQ water     |       | Drinking water |       |
|                  | L1           | L2    | L1             | L2    |
| Anastrozole      | 100.1        | 102.4 | 100.3          | 98.9  |
| Atenolol         | 84.0         | 96.7  | 107.3          | 104.9 |
| Azathioprine     | 104.9        | 103.1 | 96.9           | 94.1  |
| Bezafibrate      | 92.9         | 89.4  | 87.6           | 95.8  |
| Buprenorphine    | 88.1         | 97.0  | 89.2           | 92.6  |
| Butorphanol      | 87.2         | 98.4  | 94.6           | 97.2  |
| Caffeine         | n.d.*        | 91.7  | n.d.*          | 70.1  |
| Capecitabine     | n.d.*        | 95.8  | n.d.*          | 231.8 |
| Carbamazepine    | 97.7         | 99.5  | 101.4          | 97.3  |
| Citalopram       | 98.0         | 95.9  | 96.9           | 99.4  |
| Clofibric acid   | n.d.*        | 84.9  | n.d.*          | 75.7  |
| Cyclobenzaprine  | n.d.*        | 73.1  | n.d.*          | 116.5 |
| Cyclophosphamide | 96.9         | 104.0 | 96.5           | 100.1 |
| Diazepam         | 102.4        | 102.0 | 99.2           | 101.3 |
| Diclofenac       | n.d.*        | 97.0  | n.d.*          | 86.5  |
| Enalapril        | 103.5        | 107.6 | 115.2          | 118.3 |
| Fluoxetine       | n.d.*        | 97.5  | n.d.*          | 118.9 |
| Flutamide        | 91.0         | 87.3  | 85.7           | 89.6  |
| Furosemide       | 90.2         | 81.6  | 112.5          | 94.1  |
| Gabapentin       | n.d.*        | 96.3  | 116.9          | 107.5 |
| Gemfibrozil      | 108.9        | 97.3  | 92.2           | 93.5  |

| Analyte               | Recovery [%] |       |                |       |
|-----------------------|--------------|-------|----------------|-------|
|                       | MQ water     |       | Drinking water |       |
|                       | L1           | L2    | L1             | L2    |
| Hydrochlorothiazide   | n.d.*        | 104.9 | n.d.*          | 109.0 |
| Chloramfenikol        | 121.3        | 100.8 | 107.3          | 96.0  |
| Ifosfamide            | 106.5        | 103.4 | 101.1          | 96.5  |
| Indomethacin          | 88.3         | 80.1  | 84.8           | 88.9  |
| Iomeprol              | n.d.*        | 135.1 | n.d.*          | 263.1 |
| Iopamidol             | 103.4        | 104.0 | 74.0           | 102.3 |
| Iopromide             | 84.4         | 106.6 | 79.7           | 124.4 |
| Ketoprofen            | 86.3         | 90.8  | 104.4          | 107.3 |
| Lincomycin            | 105.2        | 105.3 | 101.8          | 102.1 |
| Loperamide            | n.d.*        | 124.6 | n.d.*          | 138.1 |
| Metoprolol            | 84.5         | 88.5  | 95.4           | 100.4 |
| Metronidazole         | 105.2        | 106.7 | 95.7           | 98.9  |
| Mycophenolate Mofetil | 83.3         | 88.7  | 96.1           | 92.8  |
| Naproxen              | n.d.*        | 98.4  | n.d.*          | 94.2  |
| Oxazepam              | 100.0        | 102.7 | 97.2           | 99.1  |
| Paclitaxel            | n.d.*        | 82.9  | n.d.*          | 76.3  |
| Paracetamol           | 94.6         | 95.9  | 99.4           | 103.3 |
| Piroxicam             | 103.9        | 106.2 | 98.3           | 100.8 |
| Propranolol           | 14.7         | 80.1  | 88.8           | 103.6 |
| Salbutamol            | 87.5         | 96.8  | 100.2          | 107.2 |
| Sertraline            | n.d.*        | 94.7  | n.d.*          | 121.2 |
| Sotalol               | 80.3         | 91.6  | 96.2           | 102.8 |
| Sulfamethazine        | 101.3        | 105.8 | 103.3          | 99.4  |
| Sulfamethoxazole      | 97.2         | 100.6 | 99.1           | 97.9  |
| Terbutaline           | 87.3         | 100.3 | 93.0           | 102.7 |
| Thebaine              | 87.2         | 91.5  | 91.7           | 89.6  |
| Tramadol              | 84.5         | 90.3  | 93.8           | 95.5  |
| Trimethoprim          | 85.5         | 83.7  | 92.4           | 95.1  |
| Valsartan             | 93.1         | 86.3  | 80.6           | 96.2  |
| Warfarin              | 81.7         | 86.3  | 96.1           | 95.6  |
| Zolpidem              | 98.7         | 96.6  | 93.2           | 96.3  |
